# Supplementary material
Source: PubMed Central journal article supplement (PMC4074663)
Supplement: peds.2013-0343_peds.2013-0343SupplementaryData.pdf [file peds.2013-0343_peds.2013-0343SupplementaryData.pdf]

## Supplemental Information

### Appendix Figure 1

Search strategy used to identify studies for review.

#### PubMed (6498)

(allergen-specific immunotherapy[tiab] OR allergen immunotherapy[tiab] OR immunotherapy[tiab] OR immunotherapy[mesh] OR immunotherap\*[tiab]) AND ((rhinitis[mh] OR rhinitis[tiab] OR hay fever[mh] OR hay fever[tiab] OR rhinoconjunctivitis[tiab] OR conjunctivitis[mh] OR "allergic conjunctivitis"[tiab] OR pollinosis[mh] OR pollinosis[tiab] OR pollenosis[tiab] OR asthma[mh] OR asthma[tiab]) NOT ("occupational diseases"[mh] OR "trachoma"[mh])) NOT (animals[mh] NOT humans[mh])

|   |                                                                                                                                                                                                                                                   |
|---|---------------------------------------------------------------------------------------------------------------------------------------------------------------------------------------------------------------------------------------------------|
| 1 | allergen-specific immunotherapy[tiab] OR allergen immunotherapy[tiab] OR immunotherapy[tiab] OR immunotherapy[mesh] OR immunotherap*[tiab]                                                                                                        |
| 2 | rhinitis[mh] OR rhinitis[tiab] OR hay fever[mh] OR hay fever[tiab] OR rhinoconjunctivitis[tiab] OR conjunctivitis[mh] OR "allergic conjunctivitis"[tiab] OR pollinosis[mh] OR pollinosis[tiab] OR pollenosis[tiab] OR asthma[mh] OR asthma [tiab] |
| 3 | "occupational diseases"[mh] OR "trachoma"[mh]                                                                                                                                                                                                     |
| 4 | 2 NOT 3                                                                                                                                                                                                                                           |
| 5 | (animals[mh] NOT humans[mh])                                                                                                                                                                                                                      |
| 6 | 1 AND 4                                                                                                                                                                                                                                           |
| 7 | 6 NOT 5                                                                                                                                                                                                                                           |

#### EMBASE (9327)

('immunotherapy'/exp OR desensiti\*ation) AND ('rhinitis'/exp OR 'allergic rhinitis'/exp OR 'hay'/exp AND 'fever'/exp OR 'rhinoconjunctivitis'/exp OR 'conjunctivitis'/exp OR 'allergic conjunctivitis'/exp OR 'asthma'/exp) AND [humans]/lim AND [embase]/lim

|   |                                                                                                                                                                              |
|---|------------------------------------------------------------------------------------------------------------------------------------------------------------------------------|
| 1 | 'immunotherapy'/exp OR desensiti*ation                                                                                                                                       |
| 2 | 'rhinitis'/exp OR 'allergic rhinitis'/exp OR 'hay'/exp AND 'fever'/exp OR 'rhinoconjunctivitis'/exp OR 'conjunctivitis'/exp OR 'allergic conjunctivitis'/exp OR 'asthma'/exp |
| 3 | [humans]/lim                                                                                                                                                                 |
| 4 | embase]/lim                                                                                                                                                                  |
| 5 | 3 AND 4                                                                                                                                                                      |
| 6 | 1 AND 2 AND 5                                                                                                                                                                |

#### COCHRANE (840)

Immunotherapy AND (rhinitis OR allergic rhinitis OR rhinoconjunctivitis OR conjunctivitis OR allergic conjunctivitis OR asthma)

#### LILACS (99)

Immunotherapy AND (rhinitis OR allergic rhinitis OR rhinoconjunctivitis OR conjunctivitis OR allergic conjunctivitis OR asthma)

#### APPENDIX FIGURE 1

Search strategy used to identify studies for review.

Appendix Figure 2

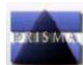

**PRISMA 2009 Checklist** – Kim, et al. Allergen-Specific Immunotherapy for Pediatric Asthma and Rhinoconjunctivitis: A Systematic Review

| Section/topic                      | #  | Checklist item                                                                                                                                                                                                                                                                                              | Reported on page #  |
|------------------------------------|----|-------------------------------------------------------------------------------------------------------------------------------------------------------------------------------------------------------------------------------------------------------------------------------------------------------------|---------------------|
| <b>TITLE</b>                       |    |                                                                                                                                                                                                                                                                                                             |                     |
| Title                              | 1  | Identify the report as a systematic review, meta-analysis, or both.                                                                                                                                                                                                                                         | 1                   |
| <b>ABSTRACT</b>                    |    |                                                                                                                                                                                                                                                                                                             |                     |
| Structured summary                 | 2  | Provide a structured summary including, as applicable: background; objectives; data sources; study eligibility criteria, participants, and interventions; study appraisal and synthesis methods; results; limitations; conclusions and implications of key findings; systematic review registration number. | 4                   |
| <b>INTRODUCTION</b>                |    |                                                                                                                                                                                                                                                                                                             |                     |
| Rationale                          | 3  | Describe the rationale for the review in the context of what is already known.                                                                                                                                                                                                                              | 5                   |
| Objectives                         | 4  | Provide an explicit statement of questions being addressed with reference to participants, interventions, comparisons, outcomes, and study design (PICOS).                                                                                                                                                  | 5                   |
| <b>METHODS</b>                     |    |                                                                                                                                                                                                                                                                                                             |                     |
| Protocol and registration          | 5  | Indicate if a review protocol exists, if and where it can be accessed (e.g., Web address), and, if available, provide registration information including registration number.                                                                                                                               | 6                   |
| Eligibility criteria               | 6  | Specify study characteristics (e.g., PICOS, length of follow-up) and report characteristics (e.g., years considered, language, publication status) used as criteria for eligibility, giving rationale.                                                                                                      | 6, Appendix Table 1 |
| Information sources                | 7  | Describe all information sources (e.g., databases with dates of coverage, contact with study authors to identify additional studies) in the search and date last searched.                                                                                                                                  | 6                   |
| Search                             | 8  | Present full electronic search strategy for at least one database, including any limits used, such that it could be repeated.                                                                                                                                                                               | Appendix Fig 1      |
| Study selection                    | 9  | State the process for selecting studies (i.e., screening, eligibility, included in systematic review, and, if applicable, included in the meta-analysis).                                                                                                                                                   | 6, Figure 1         |
| Data collection process            | 10 | Describe method of data extraction from reports (e.g., piloted forms, independently, in duplicate) and any processes for obtaining and confirming data from investigators.                                                                                                                                  | 7                   |
| Data items                         | 11 | List and define all variables for which data were sought (e.g., PICOS, funding sources) and any assumptions and simplifications made.                                                                                                                                                                       | Appendix Table 1    |
| Risk of bias in individual studies | 12 | Describe methods used for assessing risk of bias of individual studies (including specification of whether this was done at the study or outcome level), and how this information is to be used in any data synthesis.                                                                                      | 7                   |
| Summary measures                   | 13 | State the principal summary measures (e.g., risk ratio, difference in means).                                                                                                                                                                                                                               | 7, Appendix Table 3 |
| Synthesis of results               | 14 | Describe the methods of handling data and combining results of studies, if done, including measures of consistency (e.g., $I^2$ ) for each meta-analysis.                                                                                                                                                   | 7                   |
| Risk of bias across studies        | 15 | Specify any assessment of risk of bias that may affect the cumulative evidence (e.g., publication bias, selective reporting within studies).                                                                                                                                                                | 7                   |
| Additional analyses                | 16 | Describe methods of additional analyses (e.g., sensitivity or subgroup analyses, meta-regression), if done, indicating which were pre-specified.                                                                                                                                                            |                     |
| <b>RESULTS</b>                     |    |                                                                                                                                                                                                                                                                                                             |                     |
| Study selection                    | 17 | Give numbers of studies screened, assessed for eligibility, and included in the review, with reasons for exclusions at each stage, ideally with a flow diagram.                                                                                                                                             | 8                   |

**APPENDIX FIGURE 2**  
PRISMA checklist.

|                               |    |                                                                                                                                                                                                          |                                      |
|-------------------------------|----|----------------------------------------------------------------------------------------------------------------------------------------------------------------------------------------------------------|--------------------------------------|
| Study characteristics         | 18 | For each study, present characteristics for which data were extracted (e.g., study size, PICOS, follow-up period) and provide the citations.                                                             | 8, 11, 16<br>Appendix Tables 4, 5, 6 |
| Risk of bias within studies   | 19 | Present data on risk of bias of each study and, if available, any outcome level assessment (see item 12).                                                                                                | Appendix Tables 4, 5, 6              |
| Results of individual studies | 20 | For all outcomes considered (benefits or harms), present, for each study: (a) simple summary data for each intervention group (b) effect estimates and confidence intervals, ideally with a forest plot. | Appendix Tables 4, 5, 6              |
| Synthesis of results          | 21 | Present results of each meta-analysis done, including confidence intervals and measures of consistency.                                                                                                  | Tables 1, 2                          |
| Risk of bias across studies   | 22 | Present results of any assessment of risk of bias across studies (see Item 15).                                                                                                                          | 9-10, 12-14, 16                      |
| Additional analysis           | 23 | Give results of additional analyses, if done (e.g., sensitivity or subgroup analyses, meta-regression [see Item 16]).                                                                                    |                                      |
| <b>DISCUSSION</b>             |    |                                                                                                                                                                                                          |                                      |
| Summary of evidence           | 24 | Summarize the main findings including the strength of evidence for each main outcome; consider their relevance to key groups (e.g., healthcare providers, users, and policy makers).                     | 17-18                                |
| Limitations                   | 25 | Discuss limitations at study and outcome level (e.g., risk of bias), and at review-level (e.g., incomplete retrieval of identified research, reporting bias).                                            | 19                                   |
| Conclusions                   | 26 | Provide a general interpretation of the results in the context of other evidence, and implications for future research.                                                                                  | 20                                   |
| <b>FUNDING</b>                |    |                                                                                                                                                                                                          |                                      |
| Funding                       | 27 | Describe sources of funding for the systematic review and other support (e.g., supply of data); role of funders for the systematic review.                                                               | 1                                    |

From: Moher D, Liberati A, Tetzlaff J, Altman DG, The PRISMA Group (2009). Preferred Reporting Items for Systematic Reviews and Meta-Analyses: The PRISMA Statement. PLoS Med 6(6): e1000097. doi:10.1371/journal.pmed1000097

## APPENDIX FIGURE 2

Continued.

**APPENDIX TABLE 1** Study Inclusion and Exclusion Criteria

| PICO Criteria                        | Inclusion and Exclusion Criteria                                                                                                                                                                                                                                                                                                                                                                                                                                                                                                                 |
|--------------------------------------|--------------------------------------------------------------------------------------------------------------------------------------------------------------------------------------------------------------------------------------------------------------------------------------------------------------------------------------------------------------------------------------------------------------------------------------------------------------------------------------------------------------------------------------------------|
| Population and condition of interest | <p>Studies enrolled patients with allergic rhinoconjunctivitis and/or allergic asthma due to airborne allergies</p> <p>Allergic rhinoconjunctivitis must have been confirmed by using skin tests or RAST and asthma must confirmed by using pulmonary lung function tests (FEV<sub>1</sub>; methacholine challenge).</p> <p>Studies included adults, the elderly, pregnant women, individuals with severe asthma, monosensitized individuals, minorities, inner-city residents, and rural residents</p>                                          |
| Interventions                        | <p>The intervention was SIT alone or with usual care</p> <p>SIT preparation must be available for use in the United States</p> <p>No study of SIT was excluded because of timing or duration of treatment</p> <p>We excluded studies in which dosage units were not specified</p>                                                                                                                                                                                                                                                                |
| Comparisons of interest              | <p>We included studies that compared SIT (SCIT or SLIT) versus any of the following:</p> <ol style="list-style-type: none"> <li>1. Placebo</li> <li>2. Any other SIT (any form available in the United States)</li> <li>3. Pharmacotherapy (positive control)</li> <li>4. Environmental control</li> <li>5. Usual care (eg, environmental control, pharmacotherapy)</li> </ol> <p>We included studies in which SIT was used alone or in combination with any other treatment and compared with the listed comparators or any other treatment</p> |

**APPENDIX TABLE 1** Continued

| PICO Criteria      | Inclusion and Exclusion Criteria                                                                                                                                                                                                                                                                                                                                                                                                                                                                                                       |
|--------------------|----------------------------------------------------------------------------------------------------------------------------------------------------------------------------------------------------------------------------------------------------------------------------------------------------------------------------------------------------------------------------------------------------------------------------------------------------------------------------------------------------------------------------------------|
| Outcomes           | We included studies that reported the following outcomes:<br>Primary outcomes<br>1. Symptom scores (for rhinitis, conjunctivitis, or asthma)<br>2. Medication scores<br>3. Combined symptom and medication scores<br>4. QoL<br>5. Safety or harms<br>Secondary outcomes<br>1. Functional test results (PFT, FEV)<br>2. Provocational test results (for nasal, conjunctival, or bronchial challenges)<br>3. Adherence and convenience<br>4. Long-term effects of SIT (disease modification/prevention of sequelae or new sensitivities) |
| Timing and setting | We did not impose any limitation on timing or setting                                                                                                                                                                                                                                                                                                                                                                                                                                                                                  |
| Study design       | We included only RCTs                                                                                                                                                                                                                                                                                                                                                                                                                                                                                                                  |

FEV, forced expiratory volume; PFT, pulmonary function testing; RAST, radioallergosorbent test.

**APPENDIX TABLE 2** Definitions for Classifications of Magnitude of Effect

| Classification of Magnitude of Effect | Definition                                                                    |
|---------------------------------------|-------------------------------------------------------------------------------|
| Weak                                  | <15% difference in percent change between the SIT group and comparator arm    |
| Moderate                              | 15%–40% difference in percent change between the SIT group and comparator arm |
| Strong                                | >40% difference in percent change between the SIT group and comparator arm    |

**APPENDIX TABLE 3** Criteria and Definitions for Grading the Strength of Evidence

| Evidence Grade | Criteria                                                                                                                                                                                                                                                                                                                                                                                                                          | Definition                                                                                                                                                                            |
|----------------|-----------------------------------------------------------------------------------------------------------------------------------------------------------------------------------------------------------------------------------------------------------------------------------------------------------------------------------------------------------------------------------------------------------------------------------|---------------------------------------------------------------------------------------------------------------------------------------------------------------------------------------|
| High           | <ul style="list-style-type: none"> <li>At least 2 trials having low risk of bias, at least 1 of which has a strong magnitude of effect; and</li> <li>Overall body of evidence is largely consistent</li> </ul>                                                                                                                                                                                                                    | High confidence that the evidence reflects the true effect, and further research is very unlikely to change our confidence in the estimate of the effect                              |
| Moderate       | <ul style="list-style-type: none"> <li>1 trial having a low risk of bias with a strong magnitude of effect; or</li> <li>≥2 trials with medium risk of bias having strong magnitudes of effect; or</li> <li>1 trial having low risk of bias with moderate magnitude of effect plus 1 trial having medium risk of bias with strong magnitude of effect; and</li> <li>Overall body of evidence that is largely consistent</li> </ul> | Moderate confidence that the evidence reflects the true effect, and future research may change our confidence in the estimate of the effect and may change the estimate               |
| Low            | <ul style="list-style-type: none"> <li>There was evidence, but it did not meet the criteria for the above categories</li> </ul>                                                                                                                                                                                                                                                                                                   | Low confidence that the evidence reflects the true effect, and further research is likely to change our confidence in the estimate of the effect and is likely to change the estimate |
| Insufficient   | <ul style="list-style-type: none"> <li>There were no relevant trials.</li> </ul>                                                                                                                                                                                                                                                                                                                                                  | Evidence is unavailable                                                                                                                                                               |

**APPENDIX TABLE 4** SCIT Affecting Asthma Symptom Scores in Children and Adolescents

| Study                             | Allergen                                      | Comparator           | Maintenance Dose                                  | Duration of Treatment | No. of Participants | Risk of Bias | Direction of Change | Directness | Magnitude of Effect              |
|-----------------------------------|-----------------------------------------------|----------------------|---------------------------------------------------|-----------------------|---------------------|--------------|---------------------|------------|----------------------------------|
| Pifferi et al, 2002 <sup>1</sup>  | Dust mite                                     | SCIT pharmacotherapy | 800 U                                             | 3 y                   | 29                  | Medium       | +                   | Direct     | Strong                           |
| Dreborg et al, 1986 <sup>2</sup>  | <i>Cladosporium</i>                           | SCIT placebo         | 100 000 BU (reached after 18 wk)                  | 10 mo                 | 30                  | Low          | +                   | Direct     | Moderate                         |
| Kuna et al, 2011 <sup>3</sup>     | <i>Alternaria</i>                             | SCIT placebo         | 1.0 mL (5000 TU/mL) or the highest tolerated dose | 3 y                   | 50                  | Medium       | +                   | Direct     | Moderate                         |
| Hill et al, 1982 <sup>4</sup>     | Rye                                           | SCIT placebo         | 75–1000 PNU = 1 PNU of rye pollen                 | 8 mo                  | 20                  | High         | +                   | Direct     | Strong                           |
| Adkinson et al, 1997 <sup>5</sup> | Multiple                                      | SCIT placebo         | 0.7 mL of concentrate                             | 27 mo                 | 121                 | Low          | -                   | Direct     | Moderate                         |
| Cantani et al, 1997 <sup>6</sup>  | Multiple (dust mite, <i>Parietaria</i> , rye) | SCIT pharmacotherapy | 500 BU/month                                      | 3 y                   | 300                 | High         | +                   | Direct     | Could not determine <sup>a</sup> |

PNU, protein nitrogen unit. BU, biologic units; mL, milliliters; TU, treatment units; U, label units.

<sup>a</sup> Could not determine, because there was not enough data provided in the article to calculate the magnitude of effect.

**APPENDIX TABLE 5** SCIT Affecting Asthma Medication Scores in Children and Adolescents

| Study                             | Allergen                                      | Comparator           | Maintenance Dose                   | Duration of Treatment | No. of Participants | Risk of Bias | Direction of Change | Directness | Magnitude of Effect              |
|-----------------------------------|-----------------------------------------------|----------------------|------------------------------------|-----------------------|---------------------|--------------|---------------------|------------|----------------------------------|
| Pifferi et al, 2002 <sup>1</sup>  | Dust mite                                     | SCIT pharmacotherapy | 800 U                              | 3 y                   | 29                  | Medium       | +                   | Direct     | Strong                           |
| Hill et al, 1982 <sup>4</sup>     | Rye                                           | SCIT placebo         | 75–10 00 PNU = 1 PNU of rye pollen | 8 mo                  | 20                  | High         | +                   | Direct     | Moderate                         |
| Adkinson et al, 1997 <sup>5</sup> | Multiple                                      | SCIT placebo         | 0.7 mL of concentrate              | 27 mo                 | 121                 | Low          | -                   | Direct     | Weak                             |
| Cantani et al, 1997 <sup>6</sup>  | Multiple (dust mite, <i>Parietaria</i> , rye) | SCIT pharmacotherapy | 500 BU/month                       | 3 y                   | 300                 | High         | +                   | Direct     | Could not determine <sup>a</sup> |

BU, biologic units; mL, milliliters; PNU, protein nitrogen unit; U, label units.

<sup>a</sup> Could not determine, because there was not enough data provided in the article to calculate the magnitude of effect.

**APPENDIX TABLE 6** SCIT Affecting Asthma Plus Rhinitis/Rhinoconjunctivitis Medication Scores in Children and Adolescents

| Study                            | Allergen            | Comparator   | Maintenance Dose                                  | Duration of Treatment | No. of Participants | Risk of Bias | Direction of Change | Directness | Magnitude of Effect |
|----------------------------------|---------------------|--------------|---------------------------------------------------|-----------------------|---------------------|--------------|---------------------|------------|---------------------|
| Dreborg et al, 1986 <sup>2</sup> | <i>Cladosporium</i> | SCIT placebo | 100 000 BU (reached after 18 wk)                  | 10 mo                 | 30                  | Low          | +                   | Direct     | Weak                |
| Kuna et al, 2011 <sup>3</sup>    | <i>Alternaria</i>   | SCIT placebo | 1.0 mL (5000 TU/mL) or the highest tolerated dose | 3 y                   | 50                  | Medium       | +                   | Direct     | Strong              |

BU, biologic units; mL, milliliters; TU: Treatment units.

**APPENDIX TABLE 7** SCIT Affecting Combined Asthma or Asthma Plus Rhinoconjunctivitis Symptom-Medication Scores in Children and Adolescents

| Study                             | Allergen          | Comparator                                                | Maintenance Dose                                                                     | Duration of Treatment | No. of Participants | Risk of Bias | Direction of Change | Directness | Magnitude of Effect |
|-----------------------------------|-------------------|-----------------------------------------------------------|--------------------------------------------------------------------------------------|-----------------------|---------------------|--------------|---------------------|------------|---------------------|
| Altıntaş et al, 1999 <sup>7</sup> | Dust mite         | SCIT-adsorbed Al; SCIT-adsorbed Ca; SCIT-aqueous; placebo | 50 000–100 000 SQ (targeted) 60 000–100 000 SQ (actual) 6–10 IR (10 IR = 1/1000 w/v) | 2 y                   | 35                  | High         | +                   | Direct     | Strong              |
| Kuna et al, 2011 <sup>3</sup>     | <i>Alternaria</i> | SCIT Placebo                                              | 1.0 mL (5000 TU/mL) or the highest tolerated dose                                    | 3 y                   | 50                  | Medium       | +                   | Direct     | Strong              |

IR, index of reactivity; mL, milliliters; SQU, standardized quality units; TU, treatment units; w/v, weight to volume.

**APPENDIX TABLE 8** SCIT Affecting Rhinitis/Rhinoconjunctivitis Symptom Scores in Children and Adolescents

| Study                                                               | Allergen            | Comparator   | Maintenance Dose                                                  | Duration of Treatment | No. of Participants | Risk of Bias | Direction of Change | Directness | Magnitude of Effect |
|---------------------------------------------------------------------|---------------------|--------------|-------------------------------------------------------------------|-----------------------|---------------------|--------------|---------------------|------------|---------------------|
| Dreborg et al, 1986 <sup>2</sup>                                    | <i>Cladosporium</i> | SCIT placebo | 100 000 BU (reached after 18 wk)                                  | 10 mo                 | 30                  | Low          | +                   | Direct     | Weak                |
| Kuna et al, 2011 <sup>3</sup>                                       | <i>Alternaria</i>   | SCIT placebo | 1.0 mL (5000 TU/mL) or the highest tolerated dose                 | 3 y                   | 50                  | Medium       | +                   | Direct     | Moderate            |
| Möller et al, 2002 <sup>8</sup> ; Niggeman et al, 2006 <sup>9</sup> | Grass/birch         | SCIT placebo | 100 000 SQU/mL (Alutard SQ <sup>®</sup> [ALK, Hørsholm,] Denmark) | 3 y                   | 205                 | Medium       | +                   | Direct     | Strong              |

BU, biologic units; mL, milliliters; SQU, standardized quality units; TU, treatment units.

**APPENDIX TABLE 9** SCIT Affecting Conjunctivitis Symptom Scores in Children and Adolescents

| Study                                                                  | Allergen            | Comparator   | Maintenance Dose                                  | Duration of Treatment | No. of Participants | Risk of Bias | Direction of Change | Directness | Magnitude of Effect              |
|------------------------------------------------------------------------|---------------------|--------------|---------------------------------------------------|-----------------------|---------------------|--------------|---------------------|------------|----------------------------------|
| Dreborg et al, 1986 <sup>2</sup>                                       | <i>Cladosporium</i> | SCIT placebo | 100 000 BU (reached after 18 wk)                  | 10 mo                 | 30                  | Low          | +                   | Direct     | Weak                             |
| Möller et al, 2002 <sup>8</sup> ,<br>Niggeman et al, 2006 <sup>9</sup> | Grass/birch         | SCIT placebo | 100 000 SQ U/mL (Alutard SQ)                      | 3 y                   | 205                 | Medium       | +                   | Direct     | Could not determine <sup>a</sup> |
| Kuna et al, 2011 <sup>3</sup>                                          | <i>Alternaria</i>   | SCIT placebo | 1.0 mL (5000 TU/mL) or the highest tolerated dose | 3 y                   | 50                  | Medium       | +                   | Direct     | Strong                           |

BU, biologic units; mL, milliliters; SQ, standardized quality units; TU, treatment units.

<sup>a</sup> Could not determine, because there was not enough data provided in the article to calculate the magnitude of effect.

**APPENDIX TABLE 10** SCIT Affecting Rhinitis QoL in Children and Adolescents

| Study                            | Allergen                 | Comparator           | Maintenance Dose                                  | Duration of Treatment | No. of Participants | Risk of Bias | Direction of Change | Directness | Magnitude of Effect              |
|----------------------------------|--------------------------|----------------------|---------------------------------------------------|-----------------------|---------------------|--------------|---------------------|------------|----------------------------------|
| Cantani et al, 1997 <sup>6</sup> | Dust mites, grass, weeds | SCIT pharmacotherapy | 500 BU per month                                  | 3 y                   | 300                 | High         | +                   | Direct     | Could not determine <sup>a</sup> |
| Kuna et al, 2011 <sup>3</sup>    | <i>Alternaria</i>        | SCIT placebo         | 1.0 mL (5000 TU/mL) or the highest tolerated dose | 3 y                   | 50                  | Medium       | +                   | Direct     | Strong                           |

BU, biologic units; mL, milliliters; TU, treatment units.

<sup>a</sup> Could not determine, because there was not enough data provided in the article to calculate the magnitude of effect.

**APPENDIX TABLE 11** SLIT Affecting Asthma Symptoms in Children and Adolescents

| Study                                                                         | Allergen   | Comparator                 | Maintenance Dose                                     | Duration of Treatment                 | No. of Participants | Risk of Bias | Direction of Change      | Directness | Magnitude of Effect                                           |
|-------------------------------------------------------------------------------|------------|----------------------------|------------------------------------------------------|---------------------------------------|---------------------|--------------|--------------------------|------------|---------------------------------------------------------------|
| Pajno et al, 2000 <sup>10</sup>                                               | Dust mite  | SLIT placebo               | 5 drops of 10 BU/mL                                  | 2 y                                   | 24                  | Low          | Night: + VAS: +          | Direct     | Night: strong VAS: strong                                     |
| Lue et al, 2006 <sup>11</sup>                                                 | Dust mite  | SLIT placebo               | 20 drops of 300 IR/mL                                | 6 mo                                  | 20                  | Medium       | +                        | Direct     | Strong                                                        |
| Niu et al, 2006 <sup>12</sup>                                                 | Dust mite  | SLIT placebo               | 20 drops of 300 IR/mL                                | 24 wk                                 | 110                 | Medium       | +                        | Direct     | Strong                                                        |
| Hirsch et al, 1997 <sup>13</sup>                                              | Dust mite  | SLIT placebo               | 7 drops of 11.9 µg/mL = 3.75 µg                      | 1 y                                   | 30                  | Low          | +                        | Direct     | Strong                                                        |
| Bahçeciler et al, 2001 <sup>14</sup>                                          | Dust mite  | SLIT placebo               | 20 drops of 100 IR/mL                                | 6 mo                                  | 15                  | Medium       | +                        | Direct     | Moderate                                                      |
| Ippoliti et al, 2003 <sup>15</sup>                                            | Dust mite  | SLIT placebo               | 5 drops of 10 BU/mL                                  | 6 mo                                  | 86                  | Medium       | +                        | Direct     | Strong                                                        |
| Tari et al, 1990 <sup>16</sup>                                                | Dust mite  | SLIT placebo               | 15 drops of 500 STU/mL or 5BU/mL                     | 18 mo                                 | 58                  | Low          | +                        | Direct     | Moderate                                                      |
| Pajno et al, 2003 <sup>7</sup>                                                | Parietaria | SLIT placebo               | 5 drops of 10 BU/mL                                  | 13 mo                                 | 30                  | Medium       | Sx: + VAS: +             | Direct     | Sx: Could not determine VAS: could not determine <sup>a</sup> |
| Valovirta et al, 2006 <sup>18</sup> ,<br>Savolainen et al, 2006 <sup>19</sup> | Tree mix   | High dose Low dose Placebo | 100 000 SQ-U/mL (per week) 12 000 SQ-U/mL (per week) | 5 wk build-up up to 18 mo maintenance | 98                  | Medium       | High dose: + Low dose: + | Direct     | High dose: strong; Low dose: moderate                         |

BU, biologic units; IR, index of reactivity; Night, nighttime symptom score; SQ, standardized quality units; STU, standardized quality units; Sx, standard treatment units; VAS, visual analogue scale score.

<sup>a</sup> Could not determine, because there was not enough data provided in the article to calculate the magnitude of effect.

**APPENDIX TABLE 12** SLIT Affecting Asthma Plus Rhinitis or Rhinoconjunctivitis Symptoms in Children and Adolescents

| Study                                | Allergen | Comparator         | Maintenance Dose           | Duration of Treatment     | No. of Participants | Risk of Bias | Direction of Change | Directness | Magnitude of Effect |
|--------------------------------------|----------|--------------------|----------------------------|---------------------------|---------------------|--------------|---------------------|------------|---------------------|
| Valovirta et al, 2006 <sup>18</sup>  | Tree mix | High dose Low dose | 100 000 SQ-U/mL (per week) | 5 wk build-up up to 18 mo | 98                  | Medium       | High dose: +        | Direct     | High dose: strong   |
| Savolainen et al, 2006 <sup>19</sup> | Placebo  | Placebo            | 12 000 SQ-U/mL (per week)  | 18 mo maintenance         |                     |              | Low dose: +         |            | Low dose: moderate  |

SQ-U, standardized quality units.

**APPENDIX TABLE 13** SLIT Affecting Rhinitis or Rhinoconjunctivitis Symptoms in Children and Adolescents

| Study                                                                      | Allergen          | Comparator                 | Maintenance Dose                                     | Duration of Treatment                       | No. of Participants | Risk of Bias | Direction of Change         | Directness | Magnitude of Effect                     |
|----------------------------------------------------------------------------|-------------------|----------------------------|------------------------------------------------------|---------------------------------------------|---------------------|--------------|-----------------------------|------------|-----------------------------------------|
| Röder et al, 2007 <sup>20</sup>                                            | Grass mix         | SLIT placebo               | 9500 BU                                              | 2 y                                         | 204                 | Low          | +                           | Direct     | Weak                                    |
| Novembre et al, 2004 <sup>21</sup>                                         | Grass mix         | SLIT control               | 5 drops of 25 BU/mL                                  | 3 y                                         | 113                 | High         | +                           | Direct     | Could not determine <sup>a</sup>        |
| Tseng et al, 2008 <sup>22</sup>                                            | Dust mite         | SLIT placebo               | 20 drops 300 IR/mL                                   | 3 wk induction therapy, 21 wk maintenance   | 63                  | Medium       | -                           | Direct     | Weak                                    |
| Hirsch et al, 1997 <sup>13</sup>                                           | Dust mite         | SLIT placebo               | 7 drops of 11.9 µg/mL = 3.75 µg                      | 1 y                                         | 30                  | Low          | +                           | Direct     | Weak                                    |
| Bahçeciler et al, 2001 <sup>14</sup>                                       | Dust mite         | SLIT placebo               | 20 drops of 100 IR/mL                                | 6 mo                                        | 15                  | Medium       | +                           | Direct     | Moderate                                |
| Ippoliti et al, 2003 <sup>15</sup>                                         | Dust mite         | SLIT placebo               | 5 drops of 10 BU/mL                                  | 6 mo                                        | 86                  | Medium       | +                           | Direct     | Strong                                  |
| Tari et al, 1990 <sup>16</sup>                                             | Dust mite         | SLIT placebo               | 15 drops of 500 STU/mL or 5 BU/mL                    | 18 mo                                       | 58                  | Low          | +                           | Direct     | Moderate                                |
| de Bot et al, 2012 <sup>23</sup>                                           | Dust mite         | SLIT placebo               | 20 drops = 700 BU                                    | 2 y                                         | 257                 | High         | +                           | Direct     | Weak                                    |
| La Rosa et al, 1999 <sup>24</sup>                                          | <i>Parietaria</i> | SLIT placebo               | 20 drops of 300 IR/mL                                | 2 y                                         | 41                  | Low          | +                           | Direct     | Could not determine <sup>a</sup>        |
| Pajno et al, 2003 <sup>17</sup>                                            | <i>Parietaria</i> | SLIT placebo               | 5 drops of 10 BU/mL                                  | 13 mo                                       | 30                  | Medium       | +                           | Direct     | Could not determine <sup>a</sup>        |
| Vourdas et al, 1998 <sup>25</sup>                                          | Olive             | SLIT placebo               | 20 drops of 300 IR/mL                                | Seasonal (6 mo each year) for 2 y           | 70                  | Medium       | +                           | Direct     | Strong                                  |
| Valovirta et al, 2006 <sup>18</sup> ; Savolainen et al, 2006 <sup>19</sup> | Tree mix          | High dose Low dose Placebo | 100 000 SQ-U/mL (per week) 12 000 SQ-U/mL (per week) | 5 wk build-up up to 18 mo 18 mo maintenance | 98                  | Medium       | High dose: +<br>Low dose: + | Direct     | High dose: strong<br>Low dose: moderate |

BU, biologic units; IR, index of reactivity; SQU, standardized quality units; STU, standard treatment units.

<sup>a</sup> Could not determine, because there was not enough data provided in the article to calculate the magnitude of effect.



**APPENDIX TABLE 14** SLIT Affecting Conjunctivitis Symptoms in Children and Adolescents

| Study                                | Allergen          | Comparator                 | Maintenance Dose                 | Duration of Treatment                 | No. of Participants | Risk of Bias | Direction of Change         | Directness | Magnitude of Effect                     |
|--------------------------------------|-------------------|----------------------------|----------------------------------|---------------------------------------|---------------------|--------------|-----------------------------|------------|-----------------------------------------|
| Tari et al, 1990 <sup>16</sup>       | Dust mite         | SLIT placebo               | 15 drops of 500 STU/mL or 5BU/mL | 18 mo                                 | 58                  | Low          | +                           | Direct     | Weak                                    |
| de Bot et al, 2012 <sup>25</sup>     | Dust mite         | SLIT placebo               | 20 drops = 700 BU                | 2 y                                   | 257                 | High         | +                           | Direct     | Could not determine <sup>a</sup>        |
| Yourdas et al, 1998 <sup>25</sup>    | Olive             | SLIT Placebo               | 20 drops of 300 IR/mL            | Seasonal (6 mo each year) for 2 y     | 70                  | Medium       | +                           | Direct     | Strong                                  |
| Valovirta et al, 2006 <sup>18</sup>  | Tree mix          | High dose Low dose Placebo | 100 000 SQ-U/mL (per week)       | 5-wk build-up up to 18-mo maintenance | 98                  | Medium       | High dose: +<br>Low dose: + | Direct     | High dose: Strong<br>Low dose: Moderate |
| Savolainen et al, 2006 <sup>19</sup> | <i>Parietaria</i> | SLIT placebo               | 12 000 SQ-U/mL (per week)        | 13 mo                                 | 30                  | Low          | NR                          | Direct     | Could not determine <sup>a</sup>        |
| Pajno et al, 2003 <sup>17</sup>      | <i>Parietaria</i> | SLIT placebo               | 5 drops of 10 BU/mL              | 13 mo                                 | 30                  | Low          | NR                          | Direct     | Could not determine <sup>a</sup>        |

BU, biologic units; IR, Index of Reactivity; NR, not reported; SQ-U, standardized quality units; STU, standard treatment units.

<sup>a</sup> Could not determine, because there was not enough data provided in the article to calculate the magnitude of effect.

**APPENDIX TABLE 15** SLIT Affecting Medication Scores in Children and Adolescents

| Study                                | Allergen          | Comparator                 | Maintenance Dose                | Duration of Treatment                     | No. of Participants | Risk of Bias | Direction of Change               | Directness | Magnitude of Effect                                 |
|--------------------------------------|-------------------|----------------------------|---------------------------------|-------------------------------------------|---------------------|--------------|-----------------------------------|------------|-----------------------------------------------------|
| Pajno et al, 2000 <sup>10</sup>      | Dust mite         | SLIT placebo               | 5 drops of 10 BU/mL             | 2 y                                       | 27                  | Low          | +                                 | Direct     | Strong                                              |
| Lue et al, 2006 <sup>11</sup>        | Dust mite         | SLIT placebo               | 20 drops of 300 IR/mL           | 6 mo                                      | 20                  | Medium       | +                                 | Direct     | Moderate                                            |
| Niu et al, 2006 <sup>12</sup>        | Dust mite         | SLIT placebo               | 20 drops of 300 IR/mL           | 24 wk                                     | 110                 | High         | AH: +<br>BA: +<br>ICS: +<br>OC: + | Direct     | AH: strong<br>BA: strong<br>ICS: weak<br>OC: strong |
| Tseng et al, 2008 <sup>22</sup>      | Dust mite         | SLIT placebo               | 20 drops 300 IR/mL              | 3-wk induction therapy, 21-wk maintenance | 63                  | Medium       | AH: +                             | Direct     | AH: moderate                                        |
| Hirsch et al, 1997 <sup>13</sup>     | Dust mite         | SLIT placebo               | 7 drops of 11.9 µg/mL = 3.75 µg | 1 y                                       | 30                  | Low          | BA/Th: -<br>AH/INS: -<br>BA/Th: + | Direct     | BA: moderate<br>Could not determine <sup>a</sup>    |
| de Bot et al, 2012 <sup>23</sup>     | Dust mite         | SLIT placebo               | 20 drops = 700 BU               | 2 y                                       | 257                 | High         | +                                 | Direct     | Could not determine <sup>a</sup>                    |
| Röder et al, 2007 <sup>40</sup>      | Grass mix         | SLIT placebo               | 9500 BU                         | 2 y                                       | 204                 | Low          | -                                 | Direct     | Could not determine <sup>a</sup>                    |
| Novembre et al, 2004 <sup>21</sup>   | Grass mix         | SLIT control               | 20 drops 100 IR/mL              | 6 mo                                      | 113                 | High         | +                                 | Direct     | Could not determine <sup>a</sup>                    |
| La Rosa et al, 1999 <sup>24</sup>    | <i>Parietaria</i> | SLIT placebo               | 20 drops of 300 IR/mL           | 2 y                                       | 41                  | Low          | Could not determine <sup>a</sup>  | Direct     | Could not determine <sup>a</sup>                    |
| Leonardi et al, 2009 <sup>26</sup>   | <i>Parietaria</i> | SLIT placebo               | 5 drops of 10 BU/mL             | 13 mo                                     | 30                  | Low          | +                                 | Direct     | Could not determine <sup>a</sup>                    |
| Pajno et al, 2003 <sup>17</sup>      | Olive             | SLIT placebo               | 20 drops of 300 IR/mL           | Seasonal (6 mo each year) for 2 y         | 70                  | Medium       | OC: + NR for other medications    | Direct     | Could not determine <sup>a</sup>                    |
| Yourdas et al, 1998 <sup>25</sup>    | Tree mix          | High-dose Low-dose Placebo | 100 000 SQ-U/mL (per week)      | 5-wk build-up up to 18-mo maintenance     | 98                  | Medium       | High dose: +<br>Low dose: +       | Direct     | High dose: Moderate<br>Low dose: Weak               |
| Valovirta et al, 2006 <sup>18</sup>  | Tree mix          | High-dose Low-dose Placebo | 100 000 SQ-U/mL (per week)      | 5-wk build-up up to 18-mo maintenance     | 98                  | Medium       | High dose: +<br>Low dose: +       | Direct     | High dose: Moderate<br>Low dose: Weak               |
| Savolainen et al, 2006 <sup>19</sup> | Grass mix         | SLIT placebo               | 20 drops of 100 IR/mL           | 6 mo                                      | 15                  | Medium       | BA: +<br>ICS: +<br>INS: +         | Direct     | BA: Moderate<br>ICS: Strong<br>INS: Strong          |

AH, antihistamine; BA, beta agonist; BU, biologic units; ICS, inhaled corticosteroid; INS, intranasal steroid; IR, index of reactivity; NR, not reported; OC, oral corticosteroids; SQ-U, standardized quality units; Th, theophylline.

<sup>a</sup> Could not determine, because there was not enough data provided in the article to calculate the magnitude of effect.

**APPENDIX TABLE 16** SLIT Affecting Combined Symptom Plus Medication Scores in Children and Adolescents

| Study                              | Allergen                                       | Comparator   | Maintenance Dose     | Duration of Treatment | No. of Participants | Risk of Bias | Direction of Change | Directness | Magnitude of Effect              |
|------------------------------------|------------------------------------------------|--------------|----------------------|-----------------------|---------------------|--------------|---------------------|------------|----------------------------------|
| Manogna et al, 2008 <sup>27</sup>  | Dust mite, birch, grass mix, <i>Parietaria</i> | SLIT control | 5 drops 10,000 RU/mL | 3 y                   | 216                 | Medium       | +                   | Direct     | Strong                           |
| Novembre et al, 2004 <sup>21</sup> | Grass mix                                      | SLIT control | 20 drops 100 IR/mL   | 6 mo                  | 113                 | High         | +                   | Direct     | Could not determine <sup>a</sup> |

IR, index of reactivity; RU, radioallergosorbent test units.

<sup>a</sup> Could not determine, because there was not enough data provided in the article to calculate the magnitude of effect.

**APPENDIX TABLE 17** SLIT Affecting QoL in Children and Adolescents

| Study                            | Measurement Tool                                            | Allergen/Comparator    | Maintenance Dose  | Duration of Treatment | No. of Participants | Risk of Bias | Direction of Change | Directness | Magnitude of Effect                                                  |
|----------------------------------|-------------------------------------------------------------|------------------------|-------------------|-----------------------|---------------------|--------------|---------------------|------------|----------------------------------------------------------------------|
| de Bot et al, 2012 <sup>25</sup> | Pediatric RQLQ <sup>1</sup><br>Adolescent RQLQ <sup>1</sup> | Dust mite/SLIT placebo | 20 drops = 700 BU | 2 y                   | 257                 | High         | -                   | Direct     | Could not determine <sup>a</sup><br>Could not determine <sup>a</sup> |
| Röder et al, 2007 <sup>20</sup>  | Pediatric RQLQ <sup>1</sup><br>Adolescent RQLQ <sup>1</sup> | Grass mix/SLIT placebo | 9500 BU           | 2 y                   | 204                 | Low          | -                   | Direct     | Could not determine <sup>a</sup><br>Could not determine <sup>a</sup> |

BU, biologic units; RQLQ, Rhinoconjunctivitis Quality of Life Questionnaire.

<sup>a</sup> Could not determine, because there was not enough data provided in the article to calculate the magnitude of effect.

**APPENDIX TABLE 18** SLIT Versus SCIT Affecting Asthma Symptoms in Children and Adolescents

| Study                              | Allergen  | Comparator                                                        | Maintenance Dose                                                                                                                                      | Duration of Treatment | No. of Participants | Risk of Bias | Treatment favored | Directness | Magnitude of Effect |
|------------------------------------|-----------|-------------------------------------------------------------------|-------------------------------------------------------------------------------------------------------------------------------------------------------|-----------------------|---------------------|--------------|-------------------|------------|---------------------|
| Yukselen et al, 2012 <sup>28</sup> | Dust mite | SLIT + placebo injections<br>SCIT + placebo drops                 | 0.2–0.8 mL of 5000 TU/mL<br>28 drops of 1000 TU/mL                                                                                                    | 1 y                   | 31                  | Medium       | SCIT              | Direct     | Moderate            |
| Erfan et al, 2010 <sup>29</sup>    | Dust mite | Placebo injections + drops<br>SLIT<br>SCIT                        | 5 drops STU (1000 STU/mL)                                                                                                                             | 1 y                   | 48                  | Medium       | SLIT              | Direct     | Moderate            |
| Keles et al, 2011 <sup>30</sup>    | Dust mite | Pharmacotherapy<br>SLIT<br>SCIT<br>SLIT + SCIT<br>Pharmacotherapy | 100 000 SQ U/mL, 1 cm <sup>3</sup><br>44.12 µg of Der p1 + 62.1 µg of Df1<br>52.8 µg of Der p1 + 52.8 µg of Df1<br>43.2 µg of Der p1 + 43.2 µg of Df1 | 1 y                   | 56                  | Medium       | SCIT              | Direct     | Weak                |

SQU, standardized quality units; STU, standard treatment units; TU, treatment units.

**APPENDIX TABLE 19** SLIT Versus SCIT Affecting Rhinitis/Rhinoconjunctivitis Symptoms in Children and Adolescents

| Study                              | Allergen  | Comparator                                                        | Maintenance Dose                                                                                                                                     | Duration of Treatment | No. of Participants | Risk of Bias | Treatment Favored | Directness | Magnitude of Effect |
|------------------------------------|-----------|-------------------------------------------------------------------|------------------------------------------------------------------------------------------------------------------------------------------------------|-----------------------|---------------------|--------------|-------------------|------------|---------------------|
| Yukselen et al, 2012 <sup>28</sup> | Dust mite | SLIT + placebo injections<br>SCIT + placebo drops                 | 0.2–0.8 mL of 5000 TU/mL<br>28 drops of 1000 TU/mL                                                                                                   | 1 y                   | 31                  | Medium       | SCIT              | Direct     | Moderate            |
| Eifan et al, 2010 <sup>29</sup>    | Dust mite | Placebo injections + drops<br>SLIT<br>SCIT                        | 5 drops STU (1000 STU/mL)                                                                                                                            | 1 y                   | 48                  | Medium       | SLIT              | Direct     | Strong              |
| Keles et al, 2011 <sup>30</sup>    | Dust mite | Pharmacotherapy<br>SLIT<br>SCIT<br>SLIT + SCIT<br>Pharmacotherapy | 100 000 SQ U/mL, 1cm <sup>3</sup><br>44.12 µg of Der p1 + 62.1 µg of Df1<br>52.8 µg of Der p1 + 52.8 µg of Df1<br>43.2 µg of Der p1 + 43.2 µg of Df1 | 1 y                   | 56                  | Medium       | SCIT              | Direct     | Weak                |

SQU, standardized quality units; STU, standard treatment units; TU, treatment units.

**APPENDIX TABLE 20** SLIT Versus SCIT Affecting Medication Use in Children and Adolescents

| Study                              | Allergen  | Comparator                                                        | Maintenance Dose                                                                                                                                     | Duration of Treatment | No. of Participants | Risk of Bias | Treatment favored | Directness | Magnitude of Effect |
|------------------------------------|-----------|-------------------------------------------------------------------|------------------------------------------------------------------------------------------------------------------------------------------------------|-----------------------|---------------------|--------------|-------------------|------------|---------------------|
| Yukselen et al, 2012 <sup>28</sup> | Dust mite | SLIT + placebo injections<br>SCIT + placebo drops                 | 0.2–0.8 mL of 5000 TU/mL<br>28 drops of 1000 TU/mL                                                                                                   | 1 y                   | 31                  | Medium       | SCIT              | Direct     | Moderate            |
| Eifan et al, 2010 <sup>29</sup>    | Dust mite | Placebo injections + drops<br>SLIT<br>SCIT                        | 5 drops STU (1000 STU/mL)                                                                                                                            | 1 y                   | 48                  | Medium       | SLIT              | Direct     | Moderate            |
| Keles et al, 2011 <sup>30</sup>    | Dust mite | Pharmacotherapy<br>SLIT<br>SCIT<br>SLIT + SCIT<br>Pharmacotherapy | 100 000 SQ U/mL, 1cm <sup>3</sup><br>44.12 µg of Der p1 + 62.1 µg of Df1<br>52.8 µg of Der p1 + 52.8 µg of Df1<br>43.2 µg of Der p1 + 43.2 µg of Df1 | 1 y                   | 56                  | Medium       | SCIT              | Direct     | Strong              |

SQU, standardized quality units; STU, standard treatment units; TU, treatment units.

## SUPPLEMENTAL REFERENCES

- Pifferi M, Baldini G, Marrazzini G, et al. Benefits of immunotherapy with a standardized Dermatophagoides pteronyssinus extract in asthmatic children: a three-year prospective study. *Allergy*. 2002;57(9):785–790
- Dreborg S, Agrell B, Foucard T, Kjellman NI, Koivikko A, Nilsson S. A double-blind, multicenter immunotherapy trial in children, using a purified and standardized Cladosporium herbarum preparation. I. Clinical results. *Allergy*. 1986;41(2):131–140
- Kuna P, Kaczmarek J, Kupczyk M. Efficacy and safety of immunotherapy for allergies to Alternaria alternata in children. *J Allergy Clin Immunol*. 2011;127(2):502–508.e1–6
- Hill DJ, Hosking CS, Shelton MJ, Turner MW. Failure of hyposensitisation in treatment of children with grass-pollen asthma. *Br Med J (Clin Res Ed)*. 1982;284(6312):306–309
- Adkinson NF, Jr, Eggleston PA, Eney D, et al. A controlled trial of immunotherapy for asthma in allergic children. *N Engl J Med*. 1997;336(5):324–331
- Cantani A, Arcese G, Lucenti P, Gagliesi D, Bartolucci M. A three-year prospective study of specific immunotherapy to inhalant allergens: evidence of safety and efficacy in 300 children with allergic asthma. *J Investig Allergol Clin Immunol*. 1997;7(2):90–97
- Altıntaş D, Akmanlar N, Güneşer S, et al. Comparison between the use of adsorbed and aqueous immunotherapy material in Dermatophagoides pteronyssinus sensitive asthmatic children. *Allergol Immunopathol (Madr)*. 1999;27(6):309–317
- Möller C, Dreborg S, Ferdousi HA, et al. Pollen immunotherapy reduces the development of asthma in children with seasonal rhinoconjunctivitis (the PAT-study). *J Allergy Clin Immunol*. 2002;109(2):251–256
- Niggemann B, Jacobsen L, Dreborg S, et al; PAT Investigator Group. Five-year follow-up on the PAT study: specific immunotherapy and long-term prevention of asthma in children. *Allergy*. 2006;61(7):855–859
- Pajno GB, Morabito L, Barberio G, Parmiani S. Clinical and immunologic effects of long-term sublingual immunotherapy in asthmatic children sensitized to mites: a double-blind, placebo-controlled study. *Allergy*. 2000;55(9):842–849
- Lue KH, Lin YH, Sun HL, Lu KH, Hsieh JC, Chou MC. Clinical and immunologic effects of sublingual immunotherapy in asthmatic children sensitized to mites: a double-blind, randomized, placebo-controlled study. *Pediatr Allergy Immunol*. 2006;17(6):408–415
- Niu CK, Chen WY, Huang JL, Lue KH, Wang JY. Efficacy of sublingual immunotherapy with high-dose mite extracts in asthma: a multicenter, double-blind, randomized, and placebo-controlled study in Taiwan. *Respir Med*. 2006;100(8):1374–1383
- Hirsch T, Sähn M, Leupold W. Double-blind placebo-controlled study of sublingual immunotherapy with house dust mite extract (D.pt.) in children. *Pediatr Allergy Immunol*. 1997;8(1):21–27
- Bahçeciler NN, Işık U, Barlan IB, Başaran MM. Efficacy of sublingual immunotherapy in children with asthma and rhinitis: a double-blind, placebo-controlled study. *Pediatr Pulmonol*. 2001;32(1):49–55
- Ippoliti F, De Santis W, Volterrani A, et al. Immunomodulation during sublingual therapy in allergic children. *Pediatr Allergy Immunol*. 2003;14(3):216–221
- Tari MG, Mancino M, Monti G. Efficacy of sublingual immunotherapy in patients with rhinitis and asthma due to house dust mite. A double-blind study. *Allergol Immunopathol (Madr)*. 1990;18(5):277–284
- Pajno GB, Vita D, Parmiani S, Caminiti L, La Grutta S, Barberio G. Impact of sublingual immunotherapy on seasonal asthma and skin reactivity in children allergic to Parietaria pollen treated with inhaled fluticasone propionate. *Clin Exp Allergy*. 2003;33(12):1641–1647
- Valovirta E, Jacobsen L, Ljørring C, Koivikko A, Savolainen J. Clinical efficacy and safety of sublingual immunotherapy with tree pollen extract in children. *Allergy*. 2006;61(10):1177–1183
- Savolainen J, Jacobsen L, Valovirta E. Sublingual immunotherapy in children modulates allergen-induced in vitro expression of cytokine mRNA in PBMC. *Allergy*. 2006;61(10):1184–1190
- Röder E, Berger MY, Hop WC, Bernsen RM, de Groot H, Gerth van Wijk R. Sublingual immunotherapy with grass pollen is not effective in symptomatic youngsters in primary care. *J Allergy Clin Immunol*. 2007;119(4):892–898
- Novembre E, Galli E, Landi F, et al. Coseasonal sublingual immunotherapy reduces the development of asthma in children with allergic rhinoconjunctivitis. *J Allergy Clin Immunol*. 2004;114(4):851–857
- Tseng SH, Fu LS, Nong BR, Weng JD, Shyur SD. Changes in serum specific IgG4 and IgG4/IgE ratio in mite-sensitized Taiwanese children with allergic rhinitis receiving short-term sublingual-swallow immunotherapy: a multicenter, randomized, placebo-controlled trial. *Asian Pac J Allergy Immunol*. 2008;26(2–3):105–112
- de Bot CM, Moed H, Berger MY, et al. Sublingual immunotherapy not effective in house dust mite-allergic children in primary care. *Pediatr Allergy Immunol*. 2012;23(2):150–158
- La Rosa M, Ranno C, André C, Carat F, Tosca MA, Canonica GW. Double-blind placebo-controlled evaluation of sublingual-swallow immunotherapy with standardized Parietaria judaica extract in children with allergic rhinoconjunctivitis. *J Allergy Clin Immunol*. 1999;104(2 pt 1):425–432
- Vourdas D, Syriğou E, Potamianou P, et al. Double-blind, placebo-controlled evaluation of sublingual immunotherapy with standardized olive pollen extract in pediatric patients with allergic rhinoconjunctivitis and mild asthma due to olive pollen sensitization. *Allergy*. 1998;53(7):662–672
- Leonardi S, Spicuzza L, La Rosa M. High-dose sublingual immunotherapy in children at 8-year follow-up. *Ann Allergy Asthma Immunol*. 2009;102(3):259–260
- Marogna M, Tomassetti D, Bernasconi A, et al. Preventive effects of sublingual immunotherapy in childhood: an open randomized controlled study. *Ann Allergy Asthma Immunol*. 2008;101(2):206–211
- Yukselen A, Kendirli SG, Yilmaz M, Altintas DU, Karakoc GB. Effect of one-year subcutaneous and sublingual immunotherapy on clinical and laboratory parameters in children with rhinitis and asthma: a randomized, placebo-controlled, double-blind, double-dummy study. *Int Arch Allergy Immunol*. 2012;157(3):288–298
- Eifan A, Akkoc T, Yildiz A, et al. Clinical efficacy and immunological mechanisms of sublingual and subcutaneous immunotherapy in asthmatic/rhinitis children sensitized to house dust mite: an open randomized controlled study. *Clin Exp Allergy*. 2010;40(6):922–932
- Keles S, Karakoc-Aydiner E, Ozen A, et al. A novel approach in allergen-specific immunotherapy: combination of sublingual and subcutaneous routes. *J Allergy Clin Immunol*. 2011;128(4):808–815.e7
